2. Eckstein KL, Marx GF: Aortocaval compression and uterine displacement. *ANESTHESIOLOGY* 40:92-96, 1974
3. Clark RB, Thompson DS, Thompson CH: Prevention of spinal hypotension associated with cesarean section. *ANESTHESIOLOGY* 45:670-674, 1976
4. Levinson G, Shnider SM: Vasopressors in obstetrics. *Pharmacology of Adjuvant Drugs, Clinical Anesthesia*. Edited by HL Zauder. San Antonio, F. A. Davis, 1973, pp 78-108
5. Goldberg LI: Dopamine—clinical uses of an endogenous catecholamine. *N Engl J Med* 291:707-709, 1974
6. Robie NW, Goldberg LI: Comparative systemic and regional hemodynamic effects of dopamine and dobutamine. *Am Heart J* 90:340-345, 1975
7. Lappas DG, Powell WMJ, Daggett WM: Cardiac dysfunction in the perioperative period, pathophysiological diagnosis and treatment. *ANESTHESIOLOGY* 47:117-137, 1977
8. Smith BE, Hess DG: The effects of dopamine and other catecholamines on uterine blood flow in pregnant ewes. Abstracts of Scientific Papers, annual meeting of the American Society of Anesthesiologists, New Orleans, 1977, p 439.
9. Callender K, Levinson G, Shnider S, et al: Dopamine administration in the normotensive pregnant ewe. *Obstet Gynecol* 51:586-589, 1978
10. Rolbin SH, Levinson G, Shnider SM, et al: Dopamine treatment of spinal hypotension decreases uterine blood flow in the pregnant ewe. *ANESTHESIOLOGY* 51:36-40, 1979
11. Blanchard K, Dandavino A, Nuwayhid B, et al: Systemic and uterine hemodynamic responses to dopamine in pregnant and nonpregnant sheep. *Am J Obstet Gynecol* 130:669-673, 1978
12. Cabalum T, Zugaib M, Lieb S, et al: Effect of dopamine on hypotension induced by spinal anesthesia. *Am J Obstet Gynecol* 133:630-634, 1979
13. Shnider S: *Obstetrical Anesthesia: Current Concepts and practice*. Baltimore, Williams and Wilkins 1970, p 105
14. Hon EH, Reid BL, Hehre FW: The electronic evaluation of the fetal heart rate. II. Changes with maternal hypotension. *Am J Obstet Gynecol* 79:209, 1960
15. Albright G: *Anesthesia for Obstetrics: Maternal, Fetal and Neonatal Aspects*. Menlo Park, Calif., Addison-Wesley, 1978, p 202
16. Shnider S, Levinson G: *Anesthesia for Obstetrics*. Baltimore, Williams and Wilkins, 1979, p 251

Anesthesiology  
53:517-520, 1980

## Correlation of Succinylcholine Duration of Action with Plasma Cholinesterase Activity in Subjects with the Genotypically Normal Enzyme

JØRGEN VIBY-MOGENSEN, M.D.\*

In a recent analysis of 225 cases of prolonged apnea following succinylcholine administration reported to the Danish Cholinesterase Research Unit, we found that 14 patients (6.2 per cent) had low plasma cholinesterase activity (cholinesterase: E.C. 3.1.1.8, acetylcholine acylhydrolase) due to an acquired deficiency.<sup>1</sup> The durations of apnea following administration of succinylcholine, 50-250 mg (mean  $\pm$  SE:  $102 \pm 14.7$  mg) in these 14 patients ranged from 15 to 240 min (mean  $\pm$  SE:  $82 \pm 20.8$  min). These figures are not consistent with the generally accepted point of view that even a marked deficiency in enzymatic activity causes only moderate prolongation of the period of apnea following succinylcholine.<sup>2</sup>

Only one of these 14 patients was tested pre- and postoperatively with a nerve stimulator. In some cases, the prolonged apnea may have resulted from other factors, such as hyperventilation and/or residual narcotic

effect. We, therefore, sought to quantify the relationship between duration of succinylcholine-induced neuromuscular blockade and cholinesterase activity in patients with genotypically normal plasma cholinesterase.

### MATERIALS AND METHODS

From November 1977 to December 1978, plasma cholinesterase activity<sup>3</sup> and dibucaine number<sup>4</sup> were determined for 826 patients admitted for elective surgical procedures to our hospital. Patients who had plasma cholinesterase activities less than 680 (normal range: 677-1560 U/l)<sup>5</sup> or dibucaine numbers less than 80 (normal range: 78-86)<sup>5</sup> were further investigated for abnormal cholinesterase genotypes by the following determinations: fluoride number,<sup>6</sup> chloride number,<sup>7</sup> scoline number,<sup>8</sup> and urea number.<sup>9</sup> When the heterozygous occurrence of silent and usual enzymes was suspected, family studies were also conducted. Patients who had abnormal genotypes were excluded. All genotypically normal patients with low ( $n = 23$ ) or high ( $n = 6$ ) plasma cholinesterase activity and 41 patients with normal cholinesterase, selected at random, were included in the study. Thus, the final number of patients studied was 70, 43 women and 27 men of average age 46.3 years (range: 15-86 years).

\* Associate Chairman.

Received from the Department of Anesthesia, Herlev Hospital, University of Copenhagen, DK-2730 Herlev, Denmark. Accepted for publication July 8, 1980. Supported by the Danish Medical Research Council.

Address reprint requests to Dr. Viby-Mogensen.

Key words: Enzymes: cholinesterase. Neuromuscular relaxants: succinylcholine. Neuromuscular transmission: stimulator, nerve.

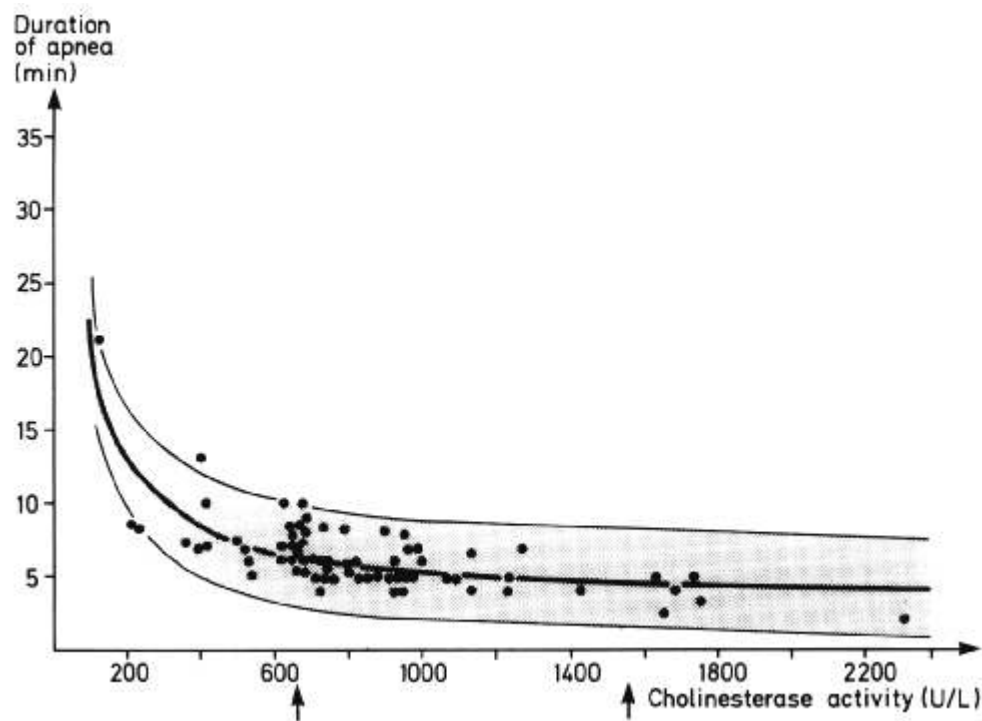

FIG. 1. Relationship between enzymatic activity and apnea following administration of succinylcholine, 1 mg/kg, iv, to 70 patients with the normal plasma cholinesterase genotype. The fitted regression line and 95 per cent prediction region are given. Arrows indicate the normal range of plasma cholinesterase activity.<sup>5</sup>

Group I comprised 23 patients with low activities (mean  $\pm$  SE: 512.2  $\pm$  34.3 U/l, range: 154–675 U/l); the 41 patients in Group II had normal plasma cholinesterase activities (mean  $\pm$  SE: 891.5  $\pm$  29.2 U/l, range: 677–1430 U/l); and the six patients in Group III had high plasma cholinesterase activities (mean  $\pm$  SE: 1795.0  $\pm$  109.6 U/l, range: 1631–2334 U/l).

Diazepam, 0.15–0.20 mg/kg, was given orally 90 min before induction of anesthesia. Anesthesia was induced with thiopental, 3–5 mg/kg, and maintained with nitrous oxide, 50 per cent, and halothane, 0.75–1.50 per cent inspired concentration, as indicated by a Fluotec<sup>®</sup> vaporizer. Ventilation was assisted or controlled as needed.

Following induction, the ulnar nerve was stimulated at the wrist through cutaneous or percutaneous electrodes connected to a nerve stimulator. The adduction

force of the resultant thumb twitch was measured by a displacement transducer (Statham UC 3, gold cell), and recorded on a polygraph. A series of four supra-maximal single stimuli (rectangular pulses of 0.2-msec duration) was applied to the nerve at 2 Hz for 2 sec every twelfth sec (train-of-four<sup>10</sup>). When the response to the train-of-four stimulation was stable (usually after 8–12 min), the height of the first twitch of the train was taken as the standard control (control twitch height). Succinylcholine, 1 mg/kg, was given intravenously, and the duration of apnea (time to recurrence of spontaneous respiration) was recorded. Monitoring of neuromuscular transmission was continued after succinylcholine administration, at least until the height of the first twitch of the train had reached the control twitch height. The times taken to first evoked response and to 25, 75, 90, and 100 per cent of the control

TABLE 1. Durations of Apnea and Times to Different Levels of Recovery of the Control Twitch Height (First Twitch in the Train-of-four Response) Following Administration of Succinylcholine, 1 mg/kg, iv, to 70 Patients with the Normal Plasma Cholinesterase Genotype (Means  $\pm$  2 SD and Ranges)

|                                     | Number of Patients | Duration of Apnea (Min)  | First Evoked Response (Min) | 25 Per Cent Twitch Height (Min) | 75 Per Cent Twitch Height (Min) | 90 Per Cent Twitch Height (Min) |
|-------------------------------------|--------------------|--------------------------|-----------------------------|---------------------------------|---------------------------------|---------------------------------|
| Group I: low enzymatic activity     | 23                 | 8.3 $\pm$ 6.5 (5.0–21.0) | 8.1 $\pm$ 5.1 (4.5–15.5)    | 9.7 $\pm$ 5.3 (7.0–17.5)        | 11.4 $\pm$ 6.0 (8.0–20.0)       | 11.6 $\pm$ 5.9 (9.0–21.0)       |
| Group II: normal enzymatic activity | 41                 | 5.8 $\pm$ 2.6 (4.0–9.0)  | 5.6 $\pm$ 2.1 (4.0–8.0)     | 7.0 $\pm$ 2.7 (4.5–10.0)        | 8.7 $\pm$ 3.1 (6.0–12.0)        | 9.3 $\pm$ 3.3 (6.0–13.0)        |
| Group III: high enzymatic activity  | 6                  | 3.7 $\pm$ 2.5 (2.5–5.0)  | 3.7 $\pm$ 2.3 (2.5–5.0)     | 4.9 $\pm$ 2.8 (3.0–6.5)         | 6.4 $\pm$ 2.6 (4.5–7.5)         | 7.3 $\pm$ 3.3 (6.0–9.0)         |

FIG. 2. Relationship between enzymatic activity and times to 100 per cent recovery of control twitch height following administration of succinylcholine, 1 mg/kg, iv, to 70 patients with the normal plasma cholinesterase genotype. The fitted regression line and 95 per cent prediction region are given. Arrows indicate the normal range of plasma cholinesterase activity.<sup>5</sup>

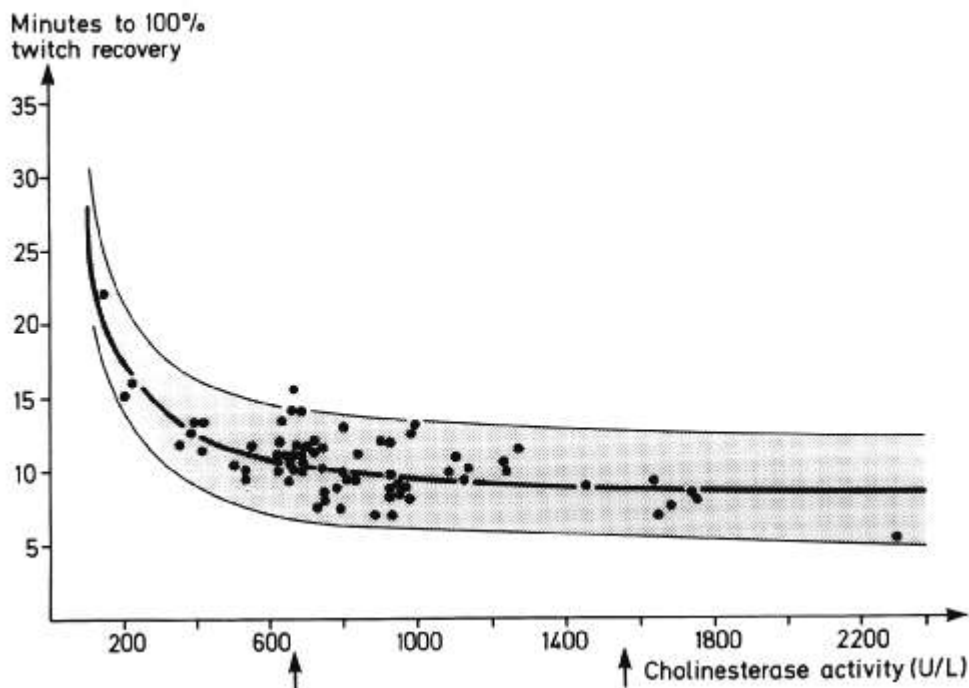

twitch height were also recorded. Three patients did not reach the control twitch height, and the reference height was taken to be that height where the first twitches of the train-of-four records were stable after succinylcholine administration.

### RESULTS

Periods of apnea and times to different levels of recovery of twitch height following the injection of succinylcholine are shown in table 1. The train-of-four ratios (the ratio of the height of the fourth to that of the first resultant twitch in the train) were indicative of a depolarizing type of neuromuscular blockade in all patients, and there was no relationship between plasma cholinesterase activity and train-of-four ratio either before or after succinylcholine administration.

Figures 1 and 2 show the relationships between plasma cholinesterase activities and durations of apnea and times to 100 per cent twitch recovery, respectively. Linear relationships were found between the inverse plasma cholinesterase activity and the duration of apnea and the time to 100 per cent recovery of twitch height.

### DISCUSSION

The results of this study show that for patients with the genotypically normal enzyme the duration of succinylcholine action increases with decreasing plasma cholinesterase activity.

The majority of studies of possible correlation be-

tween plasma cholinesterase activity and duration of apnea following succinylcholine were made before the discovery of the different genotypes of plasma cholinesterase<sup>11-16</sup> and/or were retrospective studies of only a few patients who experienced prolonged apnea.<sup>11,13,14</sup> Some found good correlation between the esterase level and duration of apnea,<sup>11-14</sup> while others found only partial correlation or no correlation at all.<sup>15,16</sup>

Since the discovery of hereditary defects in plasma cholinesterase as a cause of low enzymatic activity, at least four more studies have been reported. Both Kalow and Gunn<sup>17</sup> and Stoddart<sup>18</sup> found correlations between the durations of apnea after succinylcholine and esterase levels (51 and 31 patients, respectively). However, the studies of Kalow and Gunn<sup>17</sup> were published four years before the discovery of the fluoride-resistant gene,<sup>6</sup> and Stoddart<sup>18</sup> did not investigate his patients for hereditary defects in plasma cholinesterase. Hunter,<sup>19</sup> who measured only the dibucaine numbers, found no correlation between esterase level and duration of apnea (41 patients). None of these investigators monitored neuromuscular function.<sup>17-19</sup>

Blitt *et al.*,<sup>20</sup> using single-twitch nerve stimulation, were unable to demonstrate a correlation between esterase activity and duration of paralysis after succinylcholine administration in 50 patients. The discrepancy between this finding and our results may reflect that Blitt's patients showed only minor variations in enzymatic activities.

In summary, we found that it is possible to predict

duration of apnea and time to 100 per cent twitch recovery following administration of succinylcholine, 1 mg/kg, iv, to patients with known (genotypically normal) plasma cholinesterase activity. Slightly prolonged paralysis may occur when esterase activity is between 400 and 500 U/l, but even esterase activity as low as 150–200 U/l causes only moderate prolongation of the duration of apnea and time to 100 per cent twitch recovery (maximal time to 100 per cent twitch recovery was 22 min). This suggests that the markedly prolonged apnea seen in some of the 14 patients described in previous reports was due to factors other than low plasma cholinesterase activity.

The author is grateful to Henrik K. Hanel, M.Sc., who was responsible for the biochemical investigations, wishes to acknowledge the help of laboratory technician Mrs. G. Nørgaard, and the help of Mrs. G. Blom with the manuscript.

The mathematical model for the relationship between succinylcholine duration of action and plasma cholinesterase activity was derived by Lene Theil Skovgaard, Statistical Research Unit, Danish Medical and Social Science Research Councils, Universitetsparken 5, DK-2100 Copenhagen Ø, Denmark. Information about this model can be obtained from Lene Theil Skovgaard.

#### REFERENCES

1. Viby-Mogensen J, Hanel HK: Prolonged apnoea after suxamethonium. An analysis of the first 225 cases reported to the Danish Cholinesterase Research Unit. *Acta Anaesthesiol Scand* 22:371–380, 1978
2. Suxamethonium apnoea. Editorial. *Lancet* I:246–247, 1973
3. Kalow W, Lindsay HA: A comparison of optical and manometric methods for the assay of human serum cholinesterase. *Can J Biochem* 33:568–574, 1955
4. Kalow W, Genest K: A method for the detection of atypical forms of human serum cholinesterase. Determination of dibucaine numbers. *Can J Biochem* 35:339–346, 1957
5. Viby-Mogensen J, Hanel HK: A Danish Cholinesterase Research Unit. *Acta Anaesthesiol Scand* 21:405–412, 1977
6. Harris H, Whittaker M: Differential inhibition of human serum cholinesterase with fluoride. Recognition of two new phenotypes. *Nature (London)* 191:496–498, 1961
7. Whittaker M: The pseudocholinesterase variants. Differentiation by means of sodium chloride. *Acta Genet (Basel)* 18:556–562, 1968
8. King J, Griffin D: Differentiation of serum cholinesterase variants by succinylcholine inhibition. *Br J Anaesth* 45:450–454, 1973
9. Hanel HK, Viby-Mogensen J: The inhibition of serum cholinesterase by urea. Mechanism of action and application in the typing of abnormal genes. *Br J Anaesth* 49:1251–1257, 1977
10. Ali HH, Utting JE, Gray TC: Quantitative assessment of residual antidepolarizing block. Part I. *Br J Anaesth* 43:473–476, 1971
11. Bourne JG, Collier HOJ, Somers GF: Succinylcholine (succinoylcholine). Muscle-relaxant of short action. *Lancet* I:1225–1229, 1952
12. Evans FT, Gray PWS, Lehmann H, et al: Sensitivity to succinylcholine in relation to serum-cholinesterase. *Lancet* I:1229–1230, 1952
13. Evans FT, Gray PWS, Lehmann H, et al: Effect of pseudocholinesterase level on action of succinylcholine in man. *Br Med J* 1:136–138, 1953
14. Stovner J, Lind B: Succinylcholinapne og serumcholinesterase. *Nord Med* 52:1223–1225, 1954
15. Foldes FF, Swerdlow M, Lipschitz E, et al: Comparison of the respiratory effects of suxamethonium and suxethonium in man. *ANESTHESIOLOGY* 17:559–568, 1956
16. Borders RW, Stephen CR, Nowill WK, et al: The interrelationship of succinylcholine and the blood cholinesterase during anesthesia. *ANESTHESIOLOGY* 16:401–422, 1955
17. Kalow W, Gunn DR: The relation between dose of succinylcholine and duration of apnea in man. *J Pharmacol Exp Ther* 120:203–214, 1957
18. Stoddart JC: The suxamethonium–pseudocholinesterase relationship. *Br J Anaesth* 32:466–469, 1960
19. Hunter AR: Prolongation of the action of suxamethonium. *Anaesthesia* 21:337–345, 1966
20. Blitt CD, Petty WC, Alberternst EE, et al: Correlation of plasma cholinesterase activity and duration of action of succinylcholine during pregnancy. *Anesth Analg (Cleve)* 56:78–83, 1977
